# Supplementary material for: Suilyin Disrupts the Blood–Brain Barrier by Activating Group III Secretory Phospholipase A2
Source: MDPI journal article supplement (doi:10.3390/life12060919), 2022-06-20
Supplement: s1 [file life-1725158-supplementary.pdf › life-1725158-supplementary.pdf]

**Supplemental Table S1. Primers Used in Real-time PCR analysis and siRNAs.**

| Gene          | forward primer (5'- 3') | reverse primer (5'- 3')   |
|---------------|-------------------------|---------------------------|
| TNF- $\alpha$ | TATGAGCCCATCTATCTG      | AATGATCCCAAAGTAGAC        |
| PLA2G1        | CTATTCATACTCGTGCTCTGG   | GGTCTTTCAACAAGGTGCT       |
| PLA2G2        | CTCCCTACCTAACCAAGT      | ACGGAGTTGAGGTGGAGG        |
| PLA2G3        | GGACCACATCTCCTGCTGTT    | CCCTAACTTCCCACCTGCTAC     |
| PLA2G5        | GATTATCATCACCACCACC     | TACCCATACACCAGATTTAGAG    |
| GAPDH         | GTGGGGCGCCCCAGGCACCA    | CGGTTGGCCTTGGGGTTCAGGGGGG |
| Si-PLA2G3     | GACACCAGCUCCAGGAUAATT   | UUAUCCUGGAGCUGGUGUCTT     |

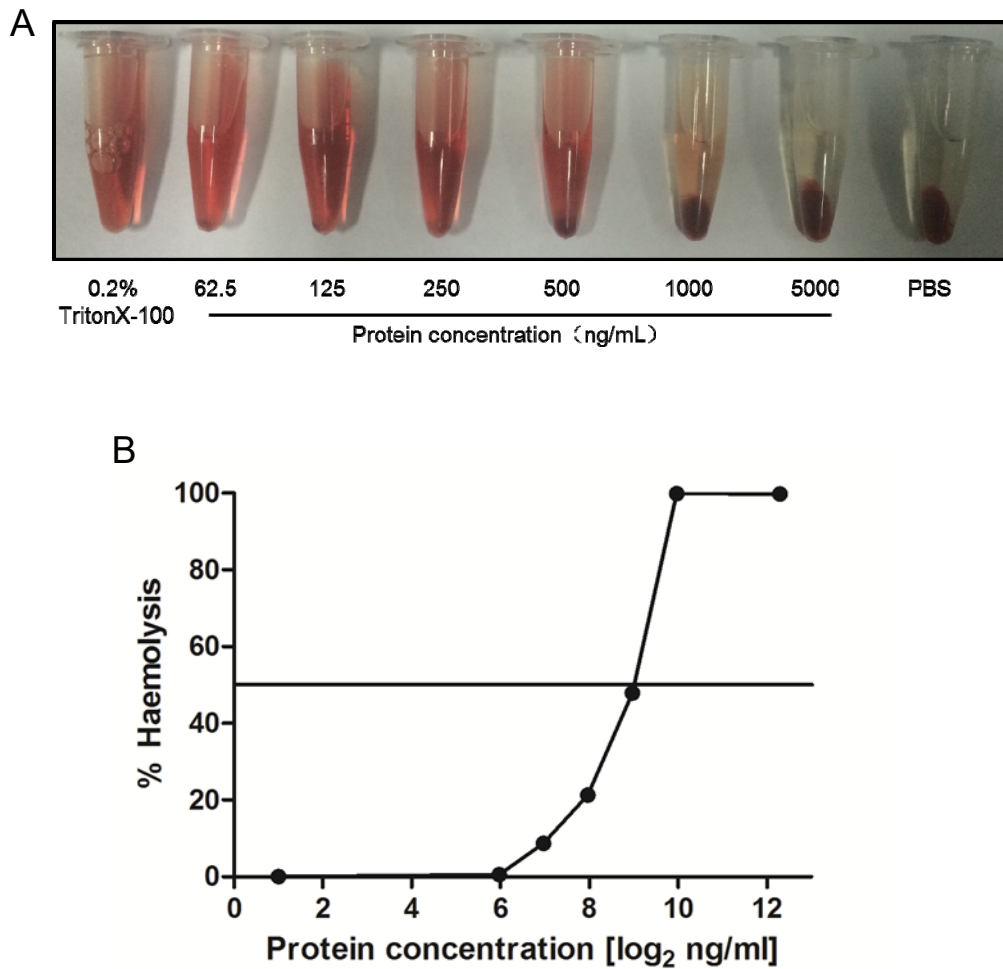

**Supplemental Figure S1.** Determination of sub-haemolytic concentration of nSLY protein. **A**, nSLY was added to 2% erythrocytes in eppendorf tube as indicated concentration and incubated at 37 °C for 60 minutes. And then the haemolysis was determined after centrifugation. **B**, Measuring the absorbance of supernatant at 540 nm. Results are showed as % haemolysis compared to erythrocytes lysed with 0.2% TritonX-100. The horizontal line indicates 50% haemolysis.

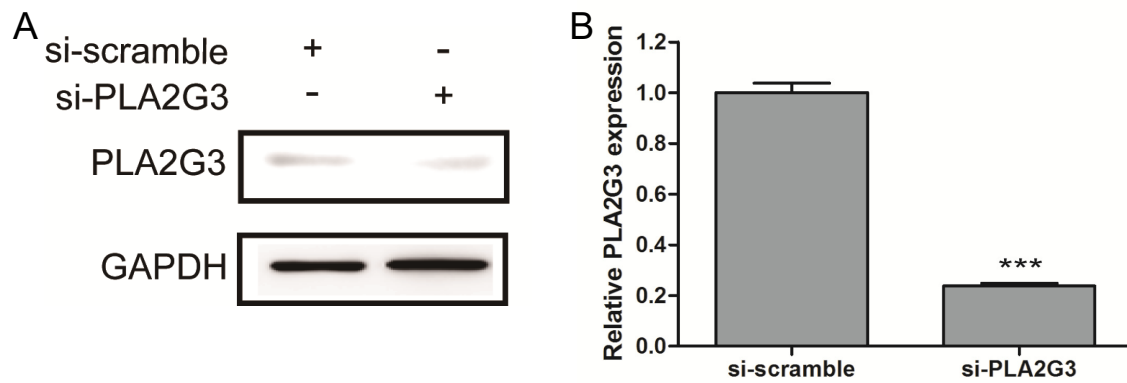

**Supplemental Figure S2.** Efficient attenuation of PLA2G3 expression in si-PLA2G3-transduced hCMEC/D3 cells. **A**, Western blot analysis of PLA2G3 in hCMEC/D3 cells after transfection with PLA2G3-targeting siRNA (si-PLA2G3) or non-targeting siRNA (si-scramble). **B**, QRT-PCR analysis of hCMEC/D3 cells transfection with si-PLA2G3 or si-scramble after nSLY stimulated 4 hours. Error bars, SEM; Unpaired Student t tests are used for statistical analysis. \*\*\* $P < 0.001$ .
